# Supplementary material for: Rapid induction of GFP expression by the nitrate reductase promoter in the diatom Phaeodactylum tricornutum
Source: PubMed Central journal article supplement (PMC5012323; doi:10.7717/peerj.2344), 2016-08-25

GFP

Chlorophyll

Merge

Merge + DIC

0 h

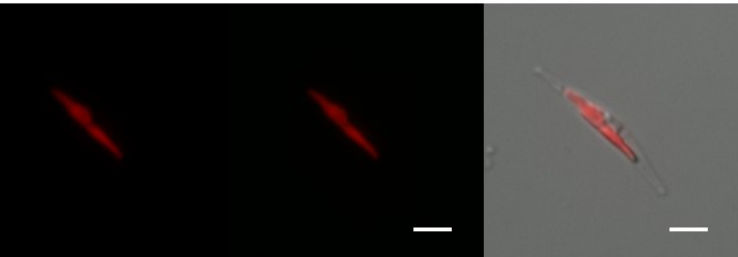

6 h

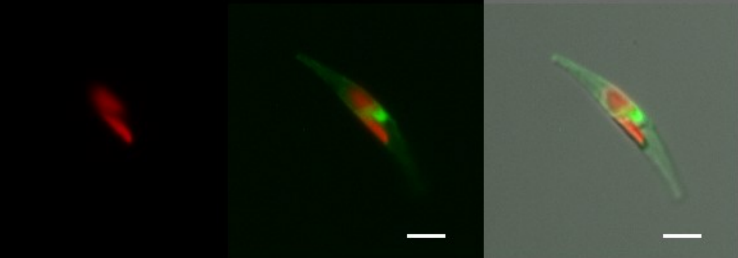

24 h

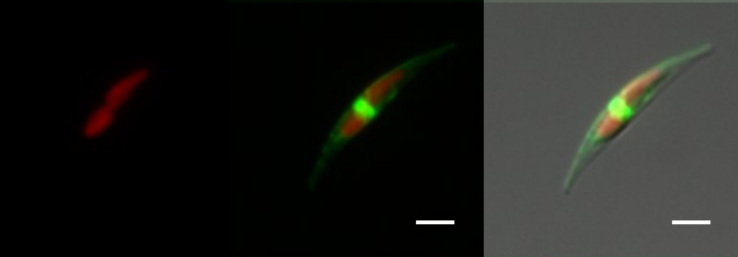

264 h

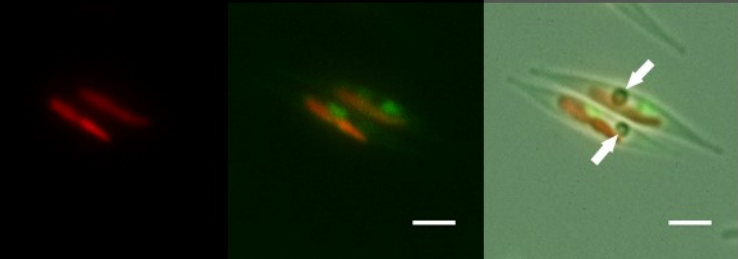

Supplement: peerj-04-2344-s005.pdf [file peerj-04-2344-s005.pdf]
