# Supplementary material for: Rapid induction of GFP expression by the nitrate reductase promoter in the diatom Phaeodactylum tricornutum
Source: PubMed Central journal article supplement (PMC5012323; doi:10.7717/peerj.2344), 2016-08-25

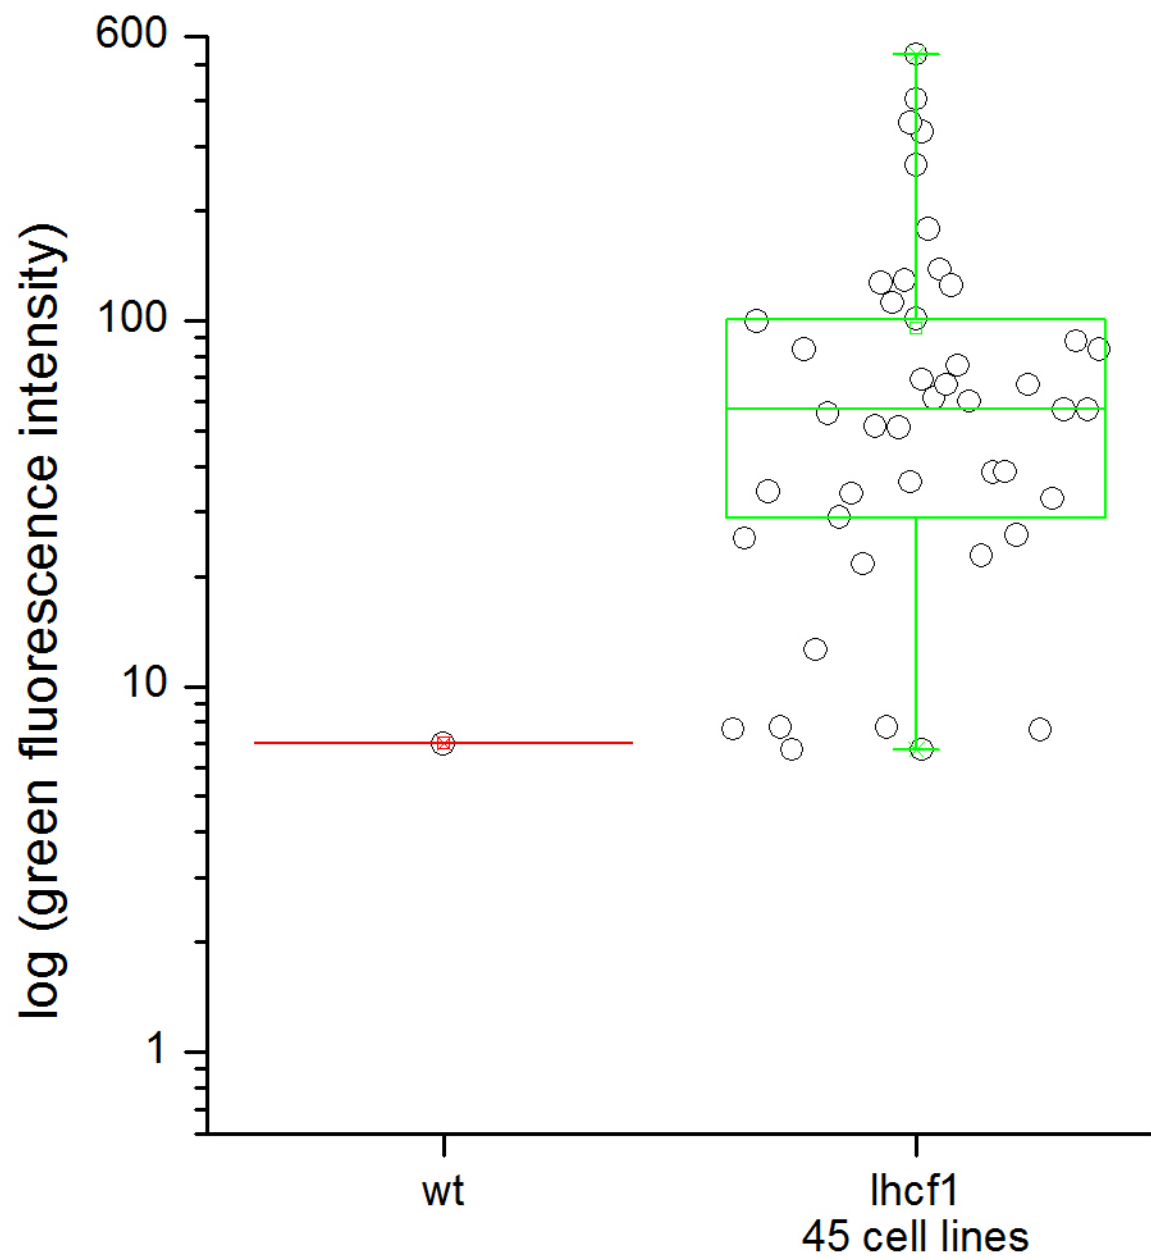

Supplement: peerj-04-2344-s006.pdf [file peerj-04-2344-s006.pdf]
