# Supplementary material for: Rapid induction of GFP expression by the nitrate reductase promoter in the diatomPhaeodactylum tricornutum
Source: PeerJ journal article supplement (doi:10.7717/peerj.2344), 2016-08-25

0 h

6 h

24 h

264 h

 $\text{NO}_3^-$  $\text{NH}_4^+$ 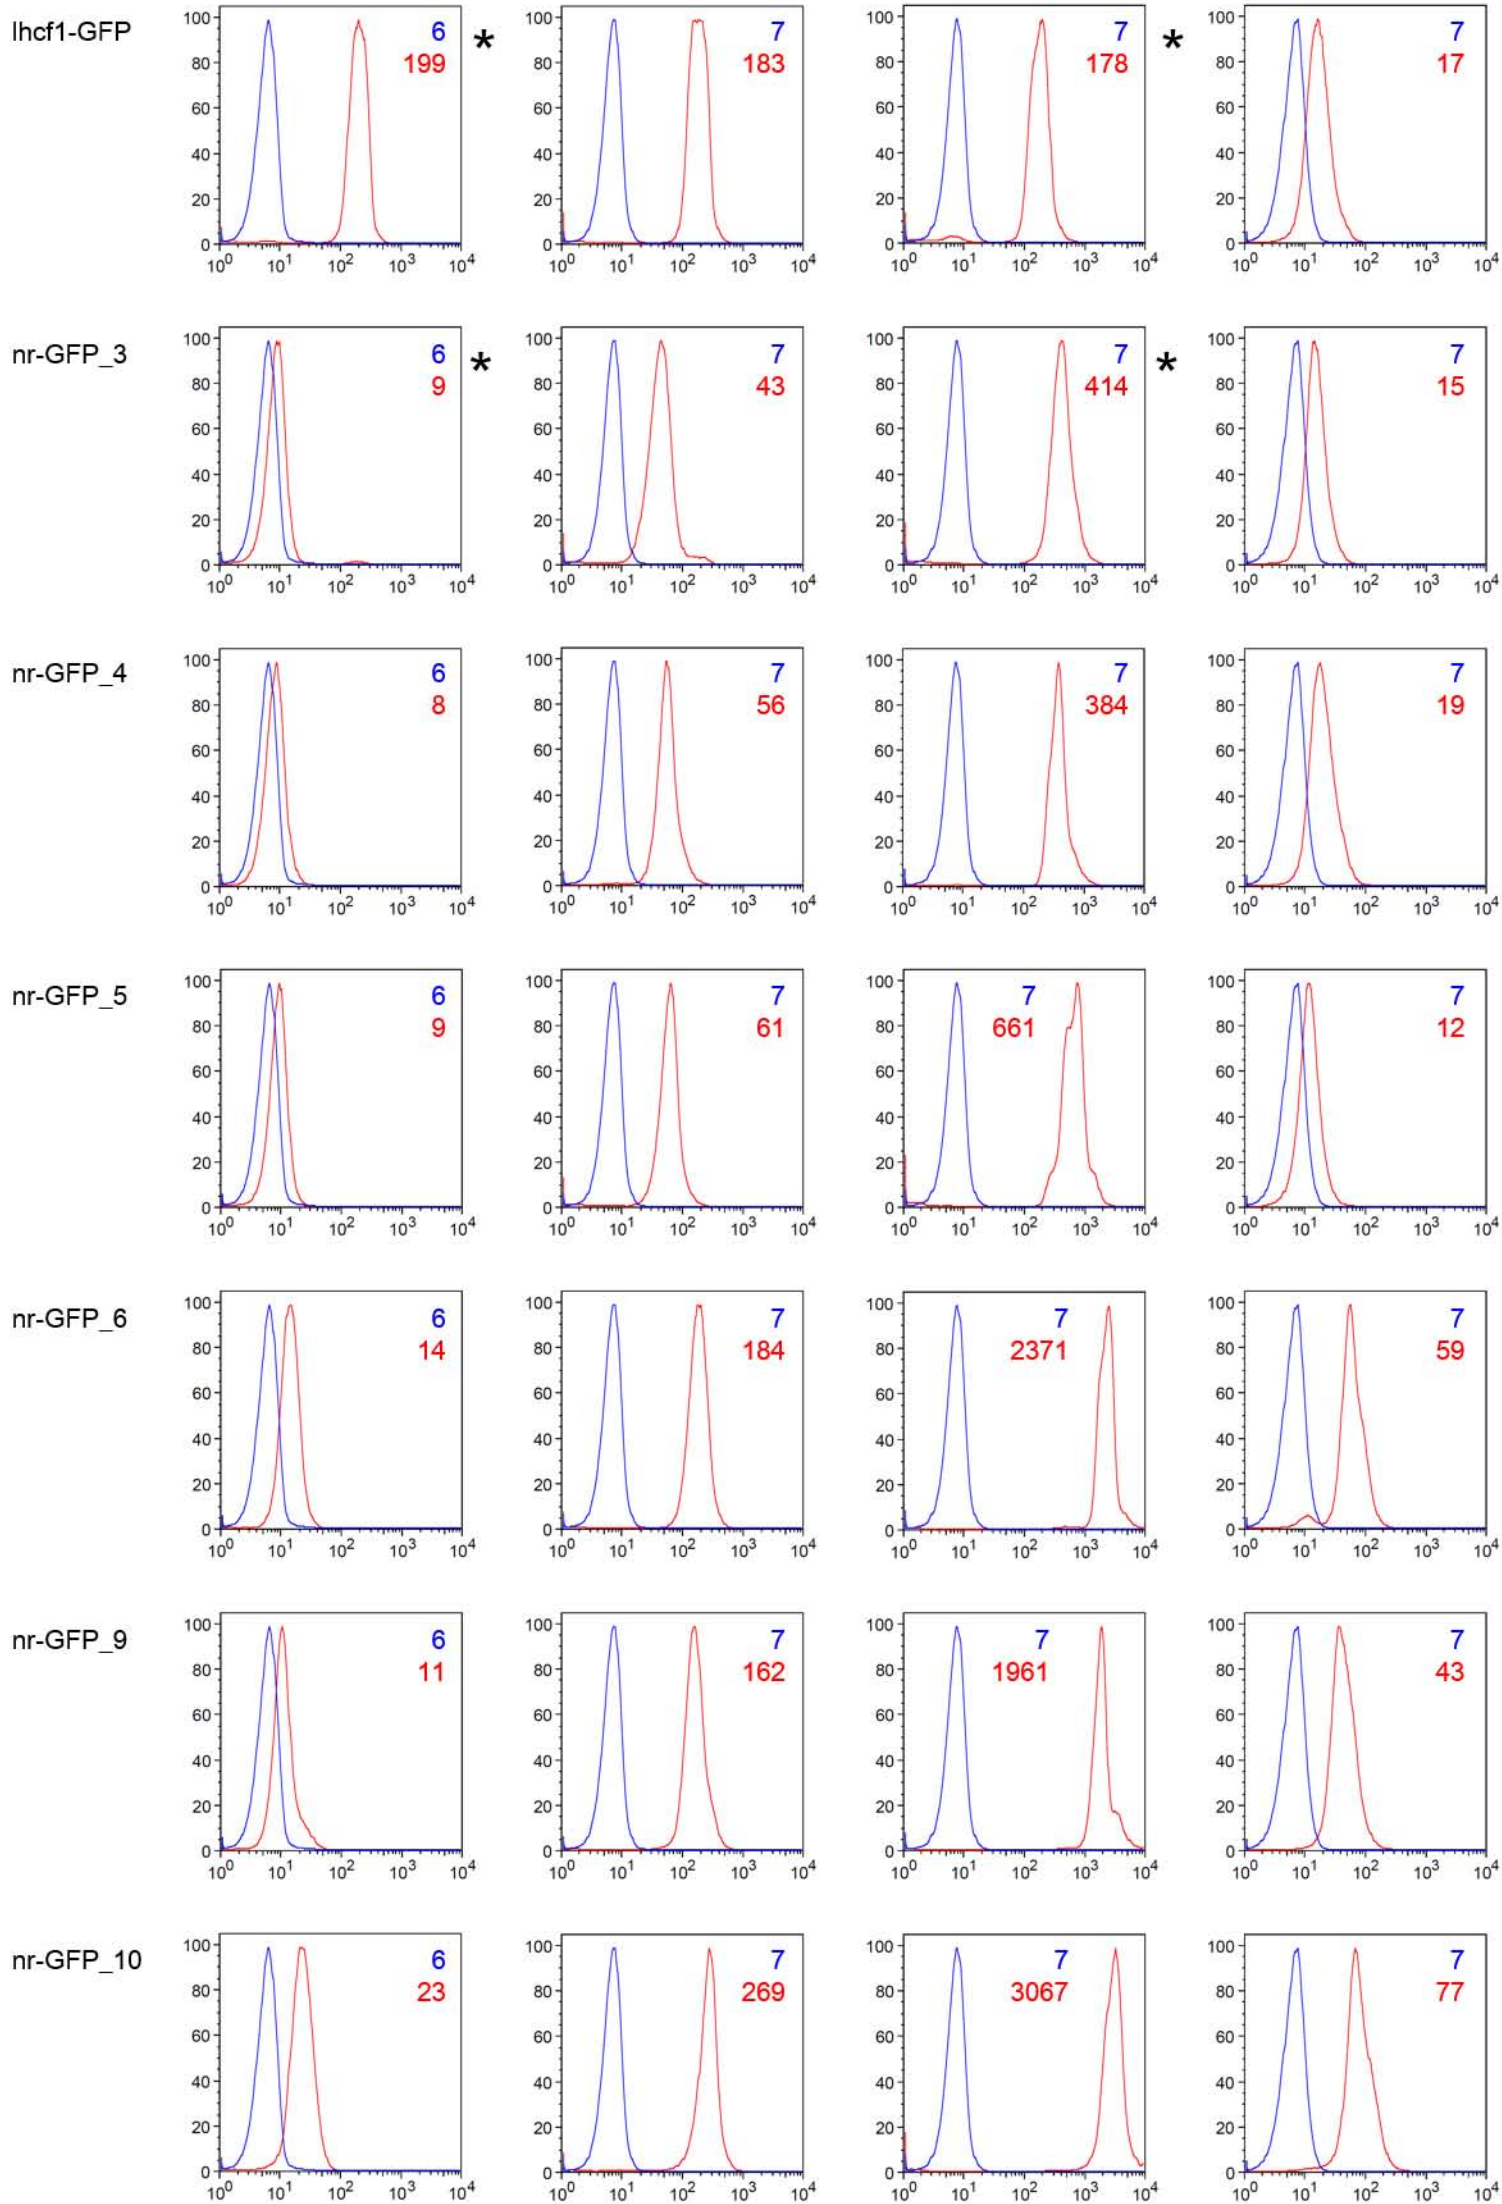

Supplement: Supplemental_Figure_S1.pdf [file Supplemental_Figure_S1.pdf]
