# Supplementary material for: Rapid induction of GFP expression by the nitrate reductase promoter in the diatomPhaeodactylum tricornutum
Source: PeerJ journal article supplement (doi:10.7717/peerj.2344), 2016-08-25

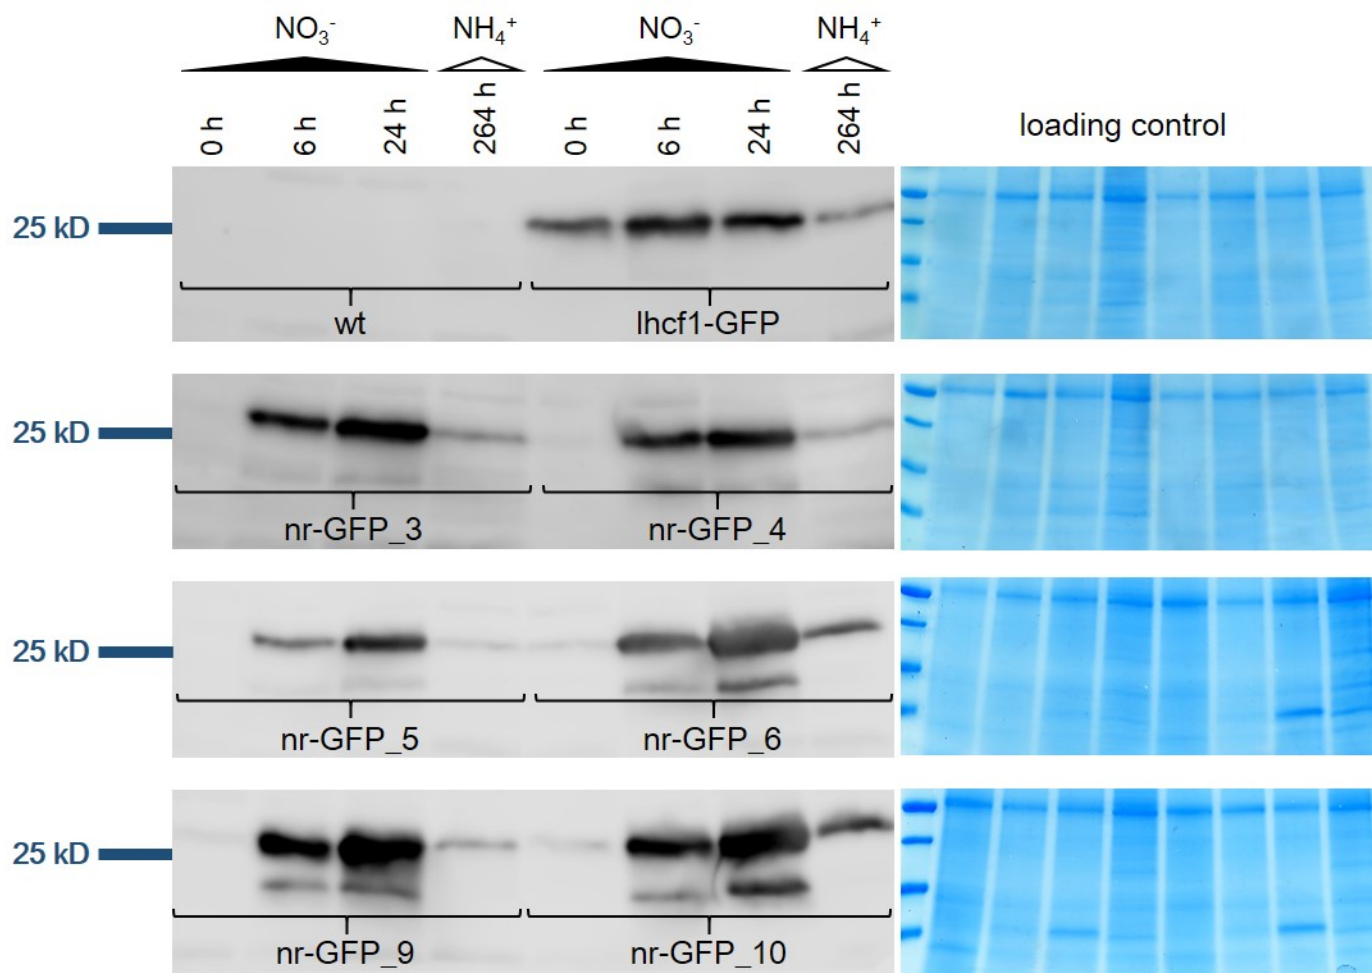

Supplement: Supplemental_Figure_S4.pdf [file Supplemental_Figure_S4.pdf]
